# Supplementary material for: Cholesterol-dependent cytolysins impair pro-inflammatory macrophage responses
Source: PubMed Central journal article supplement (PMC5915385; doi:10.1038/s41598-018-24955-2), 2018-04-24
Supplement: 41598_2018_24955_MOESM1_ESM.pdf [file 41598_2018_24955_MOESM1_ESM.pdf]

# **Cholesterol-dependent cytolysins impair pro-inflammatory macrophage responses**

Pushpak Bhattacharjee<sup>1,†</sup> and Peter A Keyel<sup>1,\*</sup>

<sup>1</sup>Department of Biological Sciences  
Texas Tech University  
Lubbock, TX 79409

<sup>†</sup>Current address:  
Department of Cell Biology and Biochemistry  
Texas Tech University Health Science Center  
Lubbock, TX 79430

\*to whom correspondence should be addressed:  
Peter Keyel  
Department of Biological Sciences  
Biology Rm 108  
Box 43131  
Lubbock, TX 79409-3131  
tel: (806) 834-6248  
fax: (806) 742-2963  
email: peter.keyel@ttu.edu

## Supplemental Material

Supplemental Figure S1  
Supplemental Figure S2

# Supplemental Figure S1

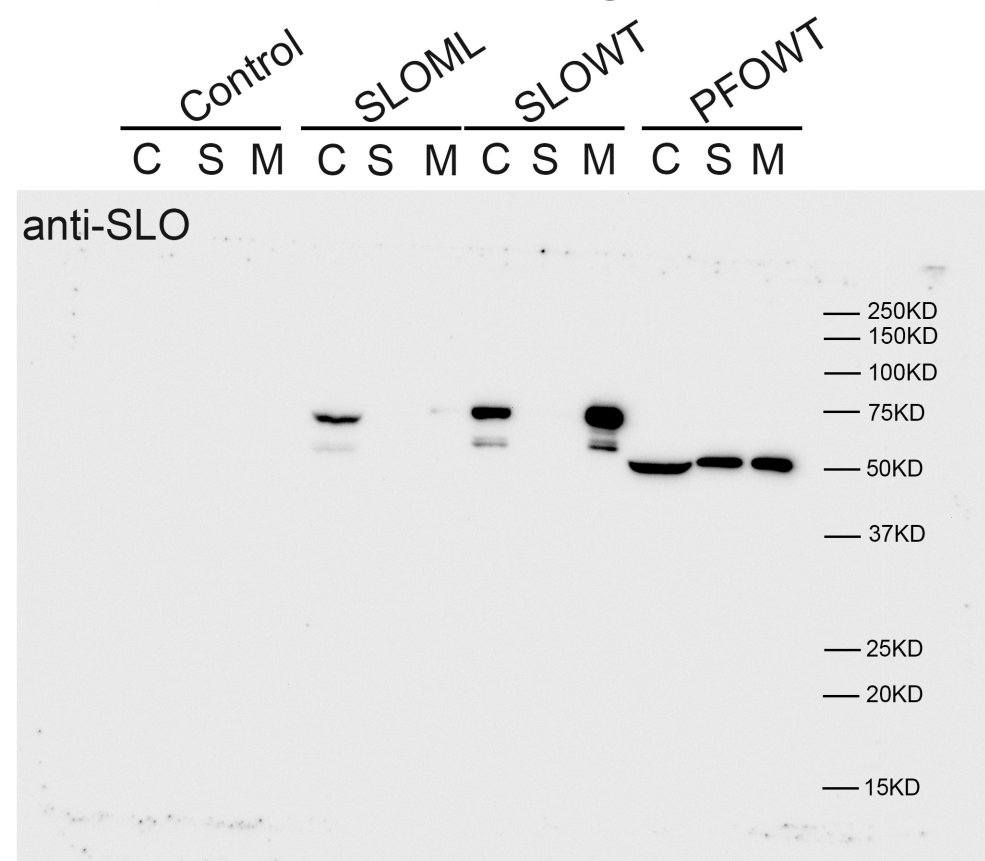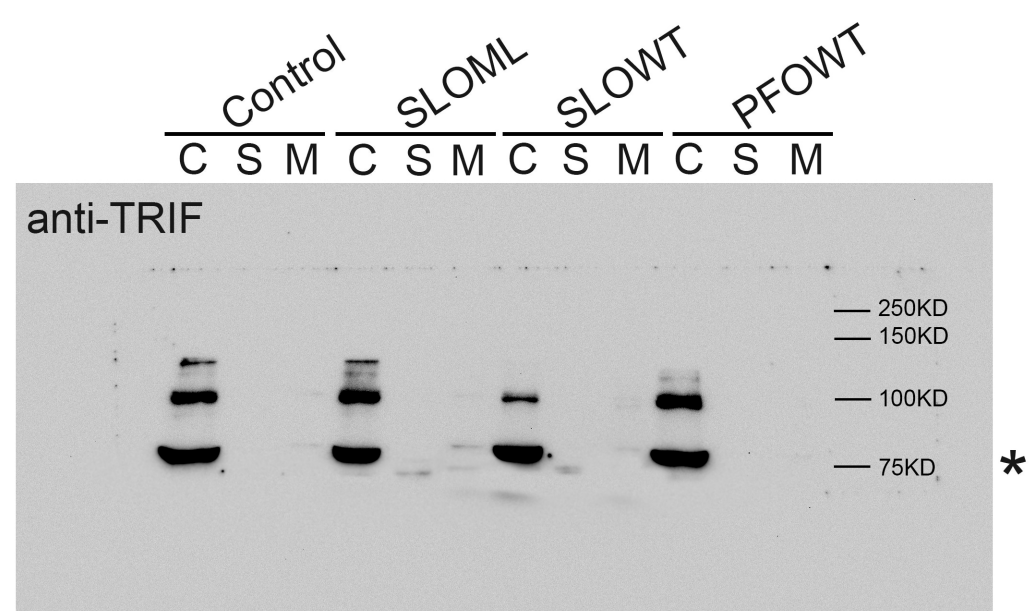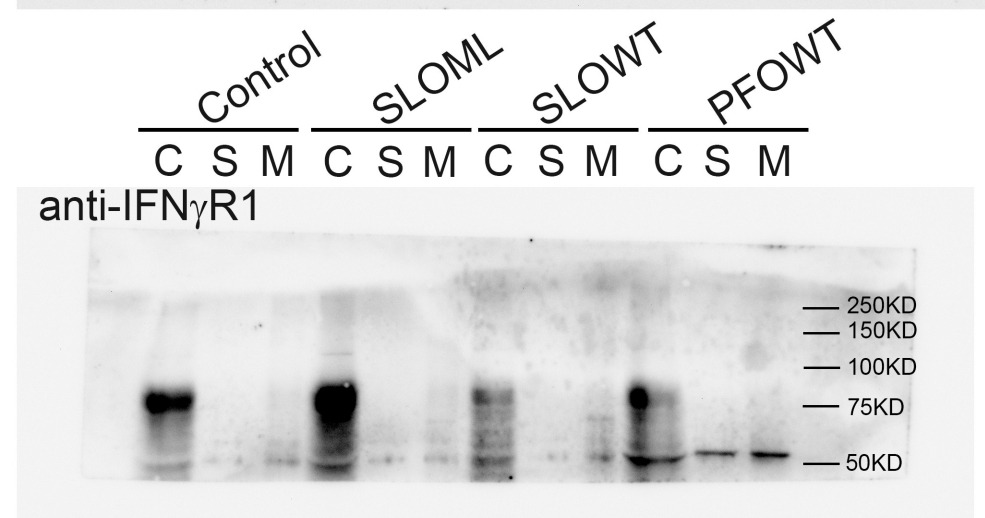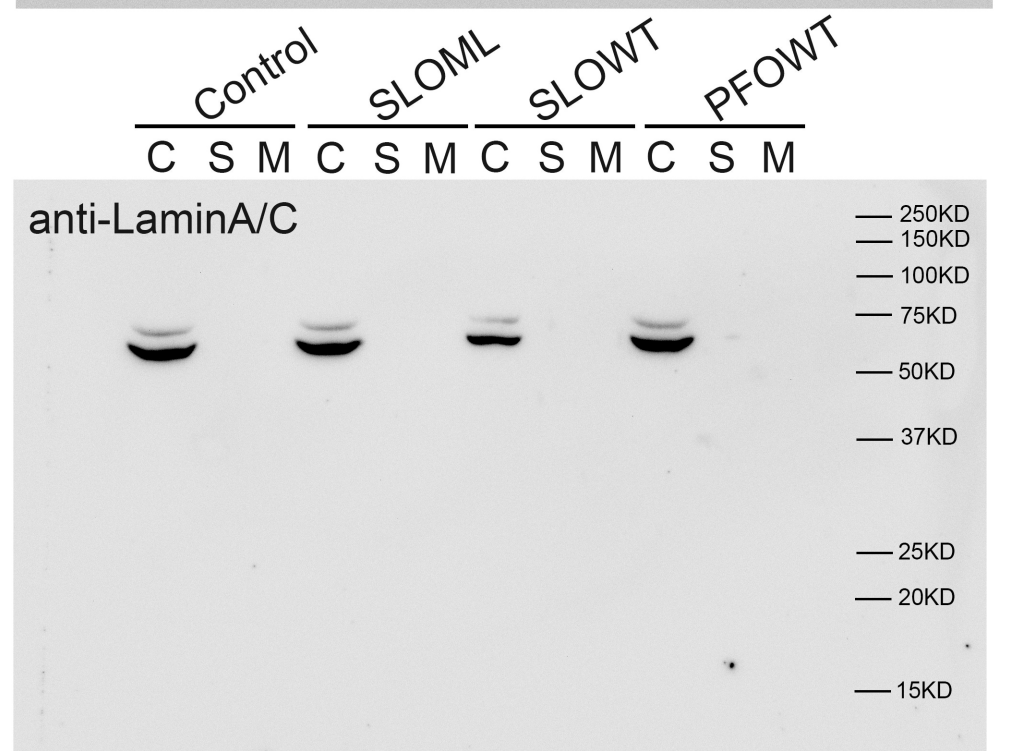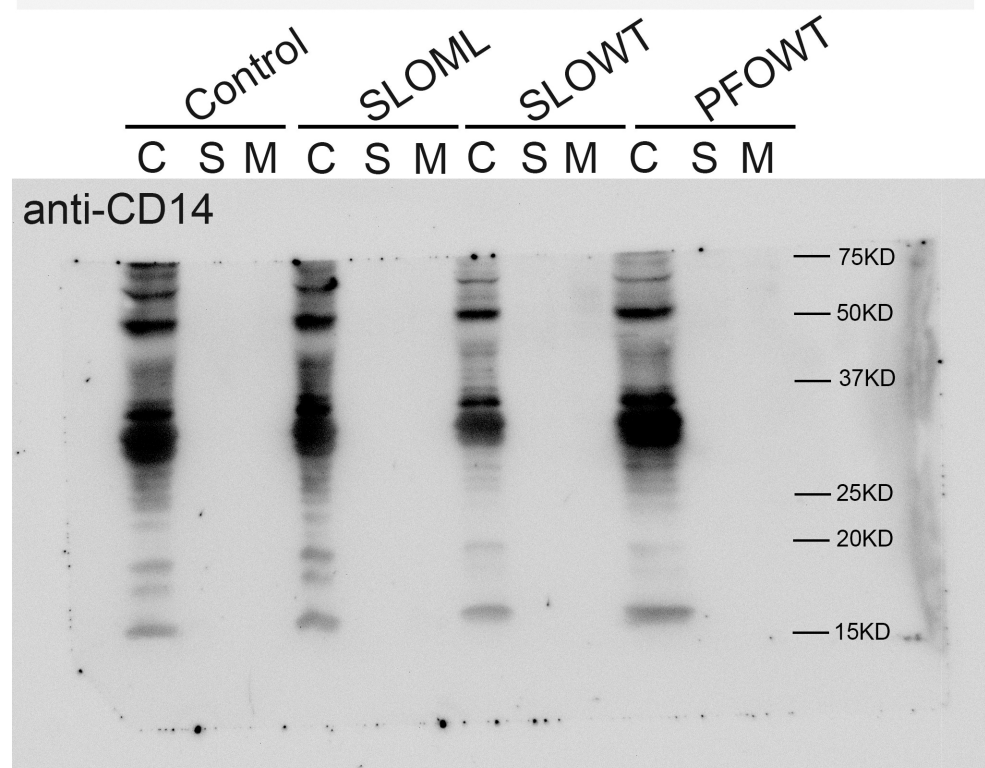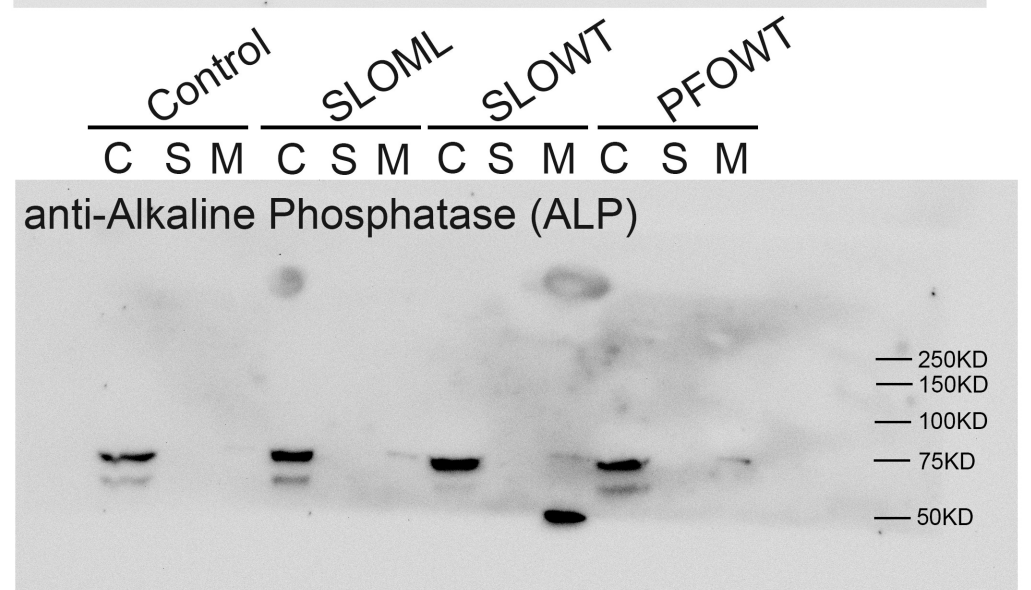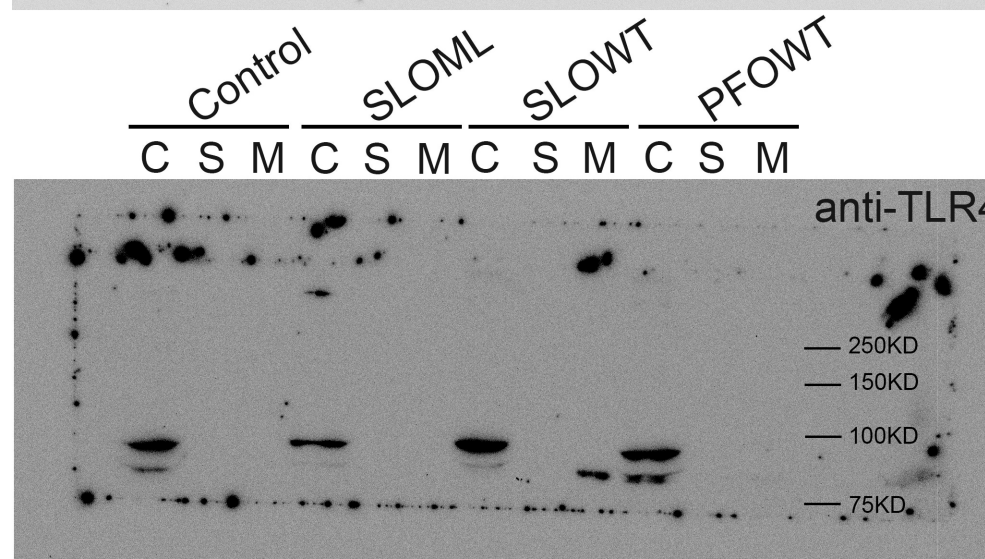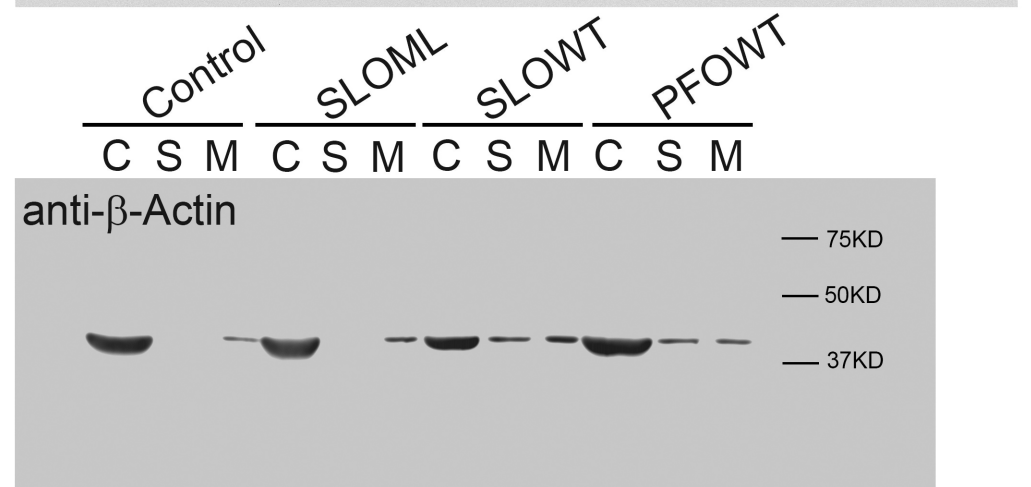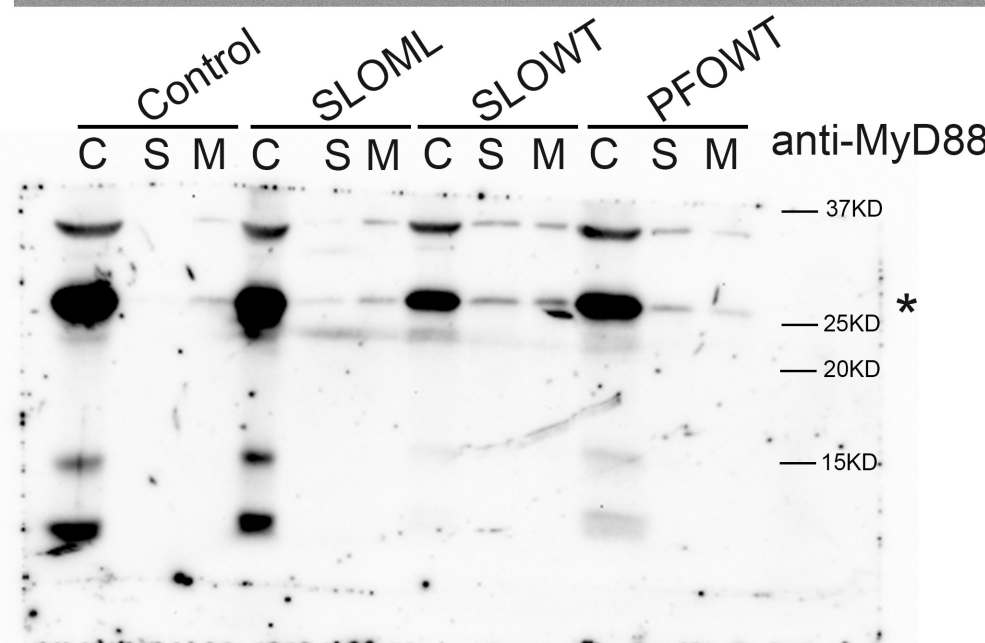

Supplementary Figure S1. Activation receptors are shed during intrinsic repair. The full western blots from Fig 5A are shown. In many cases, the blots were cut following Ponceau S stain and prior to staining with primary antibody. The \* denotes bands remaining due to incomplete stripping of prior antibodies. C = cell pellet, S = high speed supernatant, M = microvesicle pellet. Size in kilodaltons (KD) is shown.

# Supplemental Figure S2

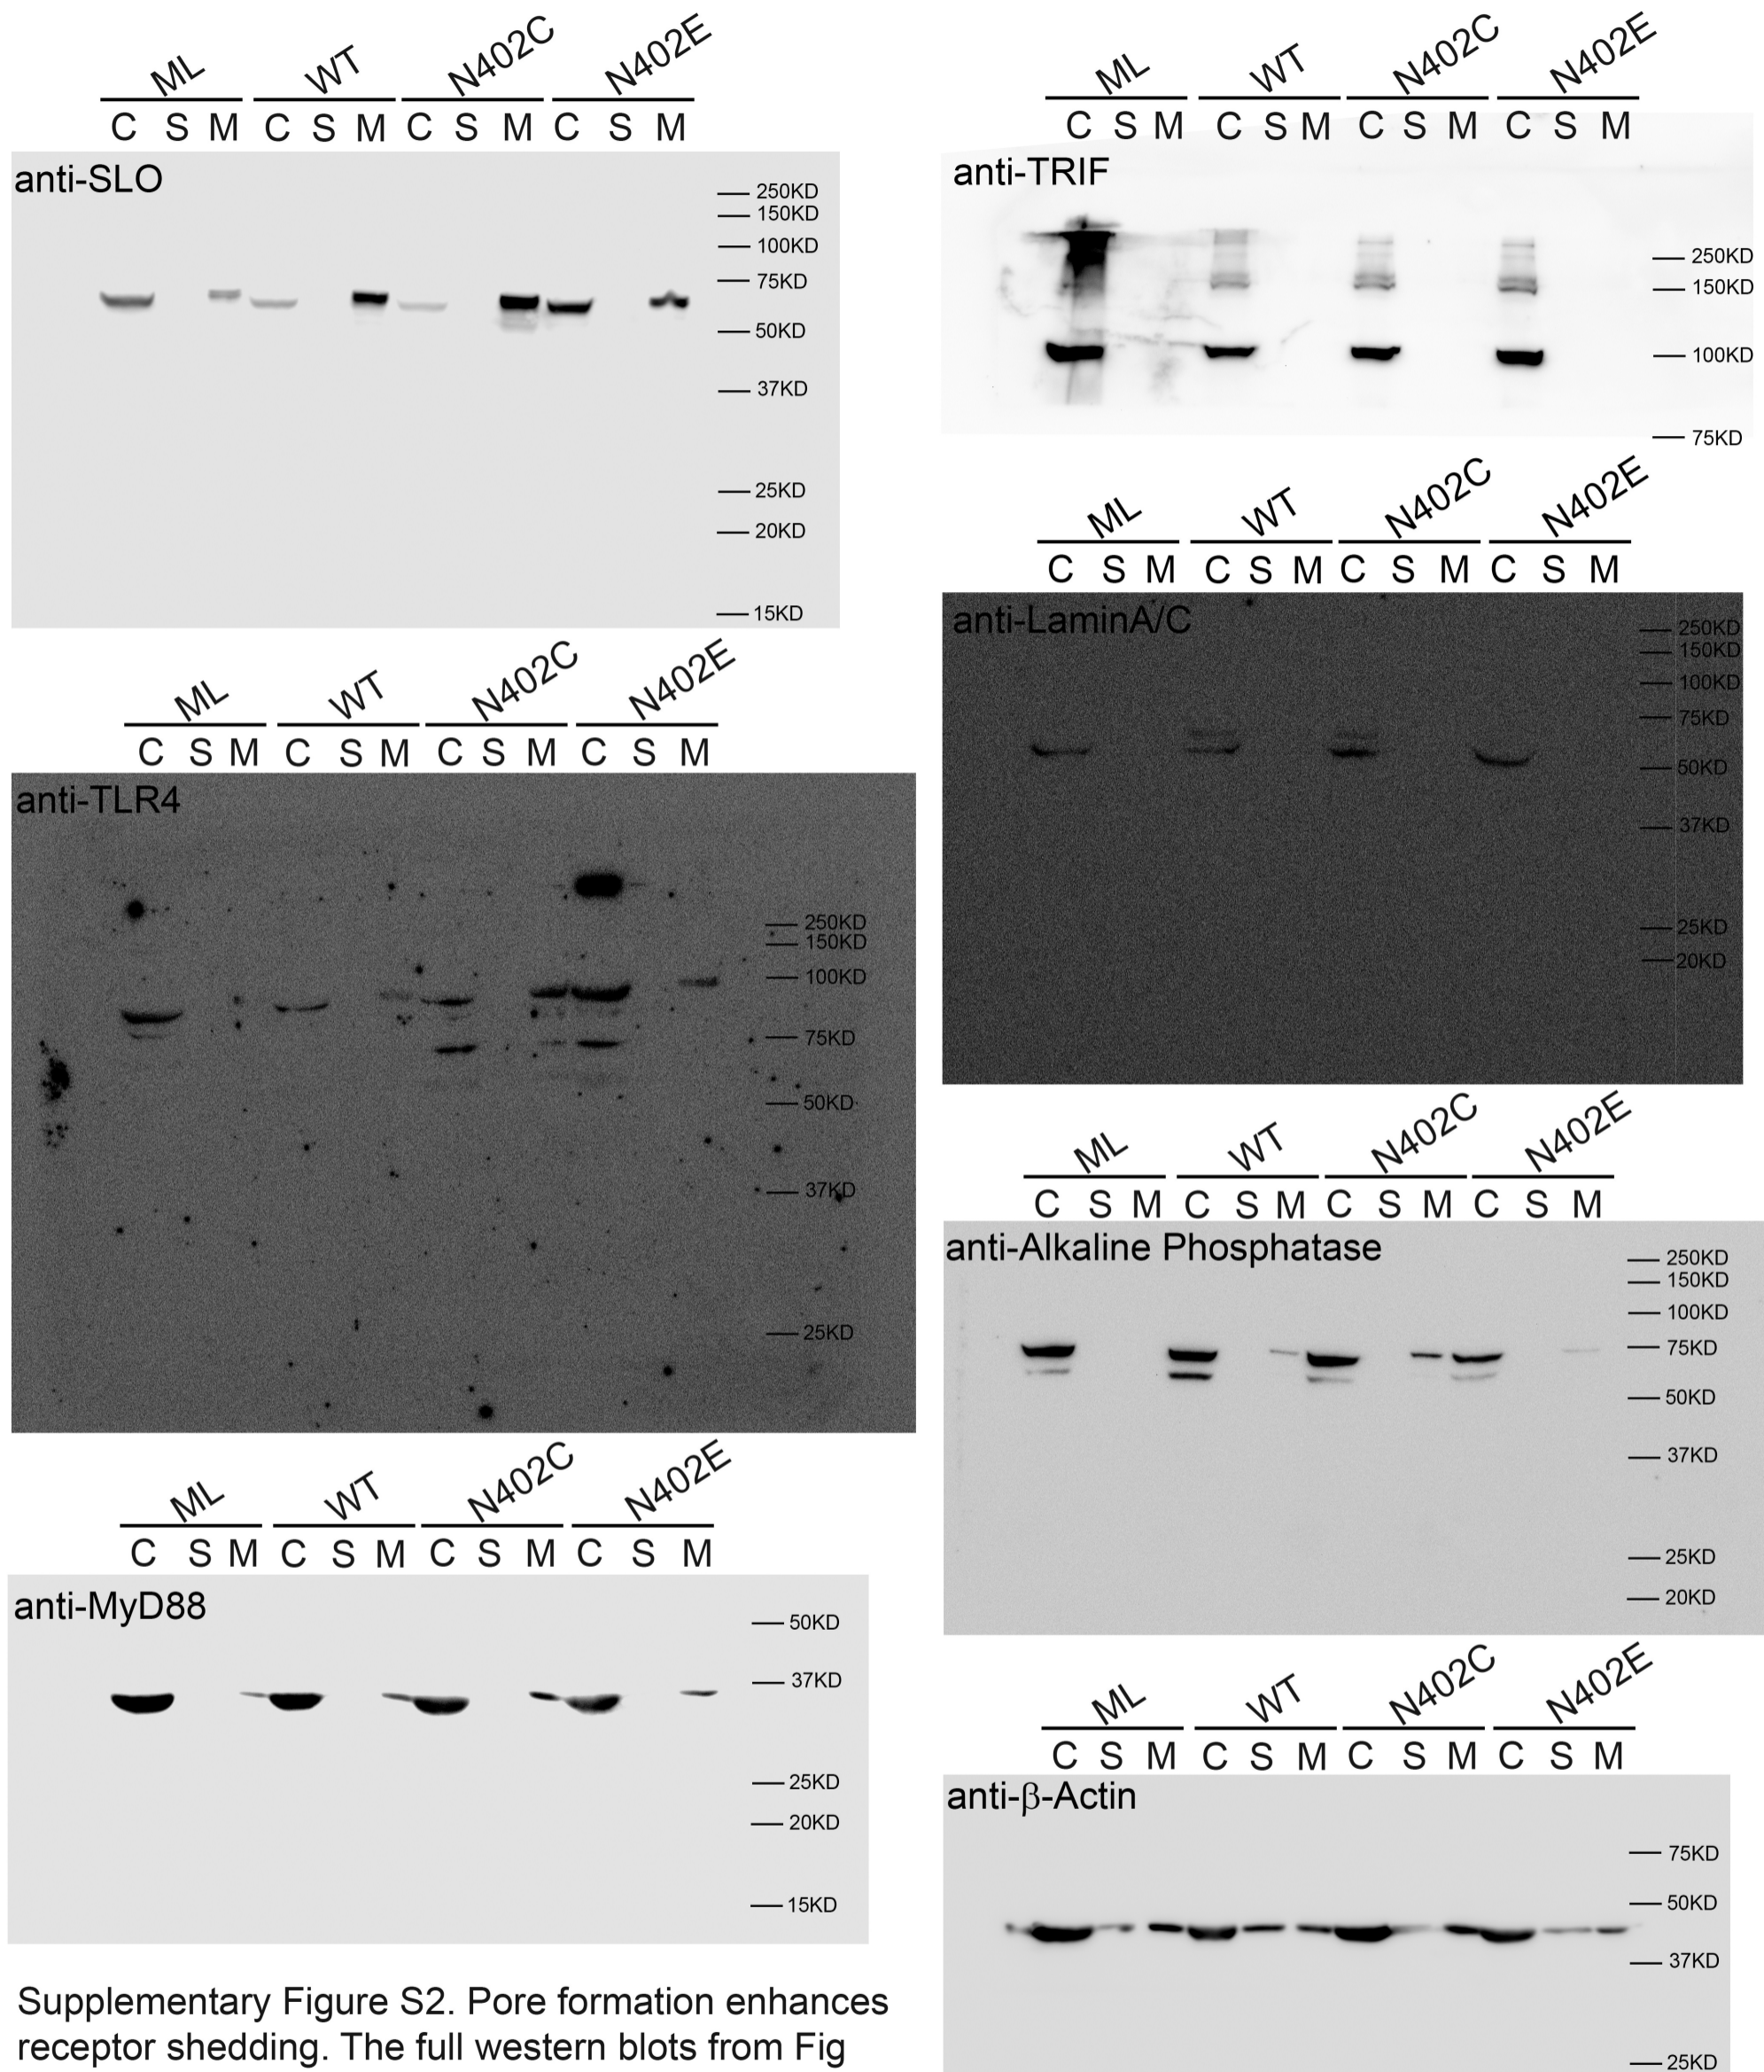

Supplementary Figure S2. Pore formation enhances receptor shedding. The full western blots from Fig 5B are shown. In many cases, the blots were cut following Ponceau S stain and prior to staining with primary antibody. C = cell pellet, S = high speed supernatant, M = microvesicle pellet. Size in kilodaltons (KD) is shown.
